# Supplementary material
Source: publisher figshare collection journal article supplement (https://acs.figshare.com/ndownloader/files/4206691)

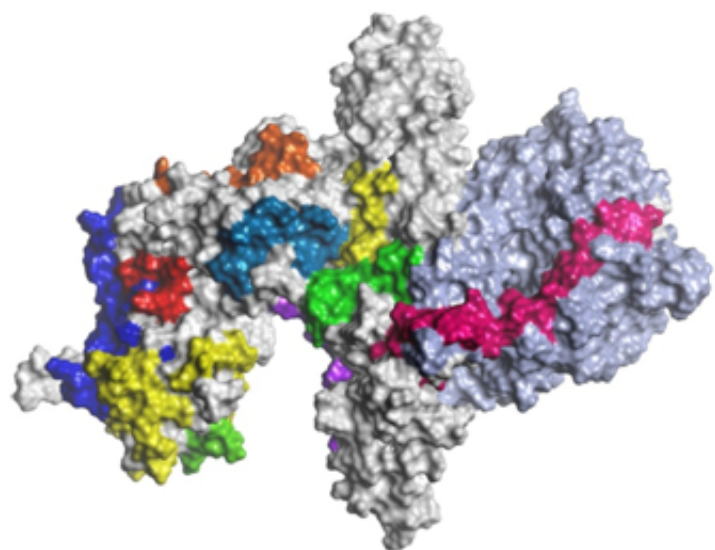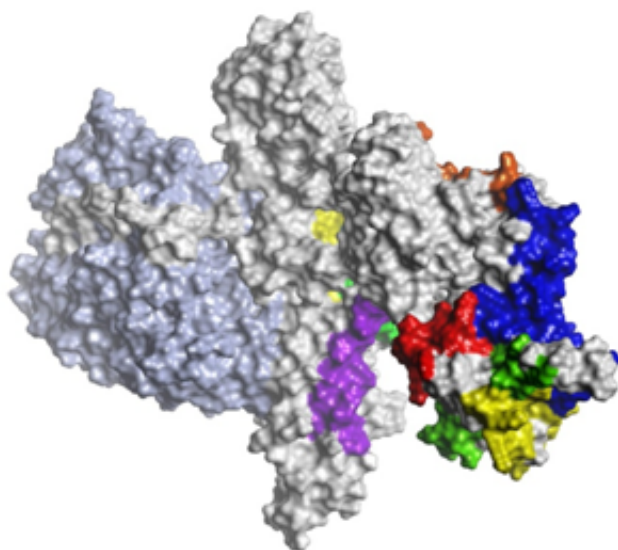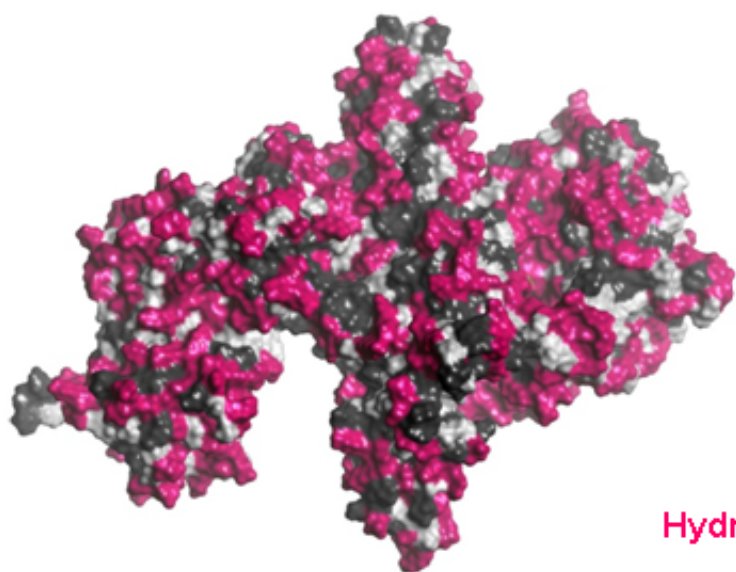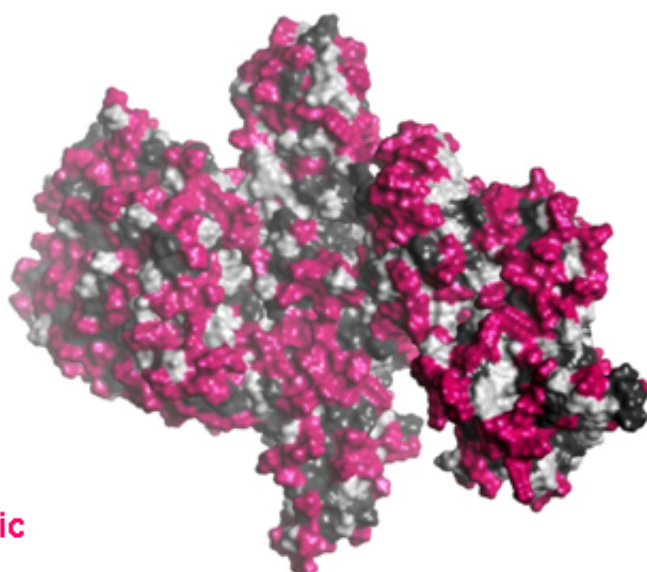

Hydrophilic  
Hydrophobic

Supplement: Supplementary file 1 [file 4206691]
